# Supplementary material for: Age-dependent progenitor switching shapes adult brown adipose tissue heterogeneity
Source: Research Square preprint supplement (doi:10.21203/rs.3.rs-8515565/v1), 2026-01-21
Supplement: Supplementary file 1 [file b0d5c58d8c8cadf6259414c5.docx]

**Fig. S1 Integrative analysis of CD45- SVF cells from BAT**


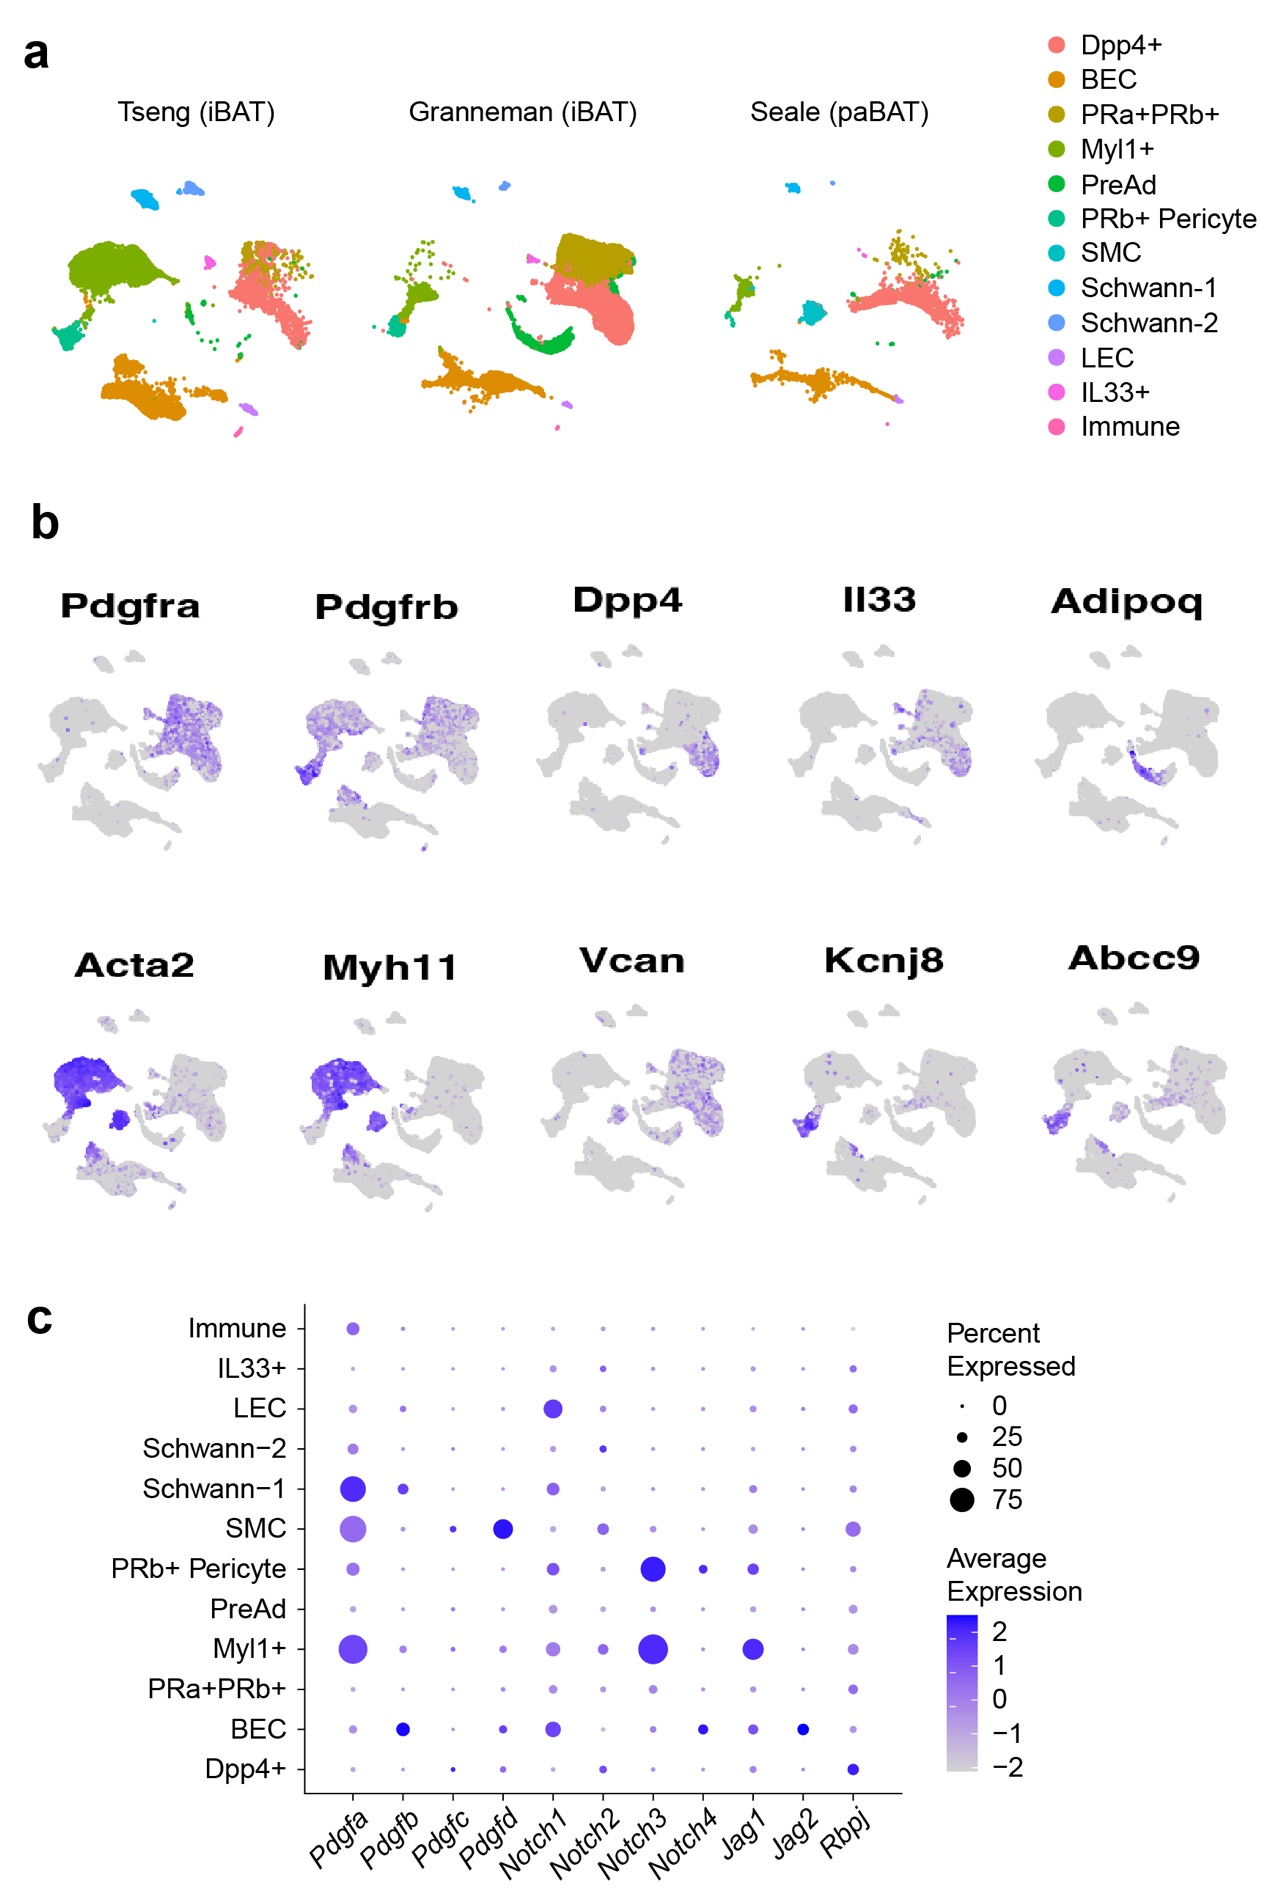


**a**, The distribution of SVF populations across three studies by Granneman, Tseng, and Seale groups. **b**, UMAP plots showing gene expression at single-cell level. **c**, Dot plot for the expression of selected niche factors that inhibit adipogenesis from *Pdgfra*+ APCs.

**Fig. S2 Absence of *Myl1*+ APCs in WAT**


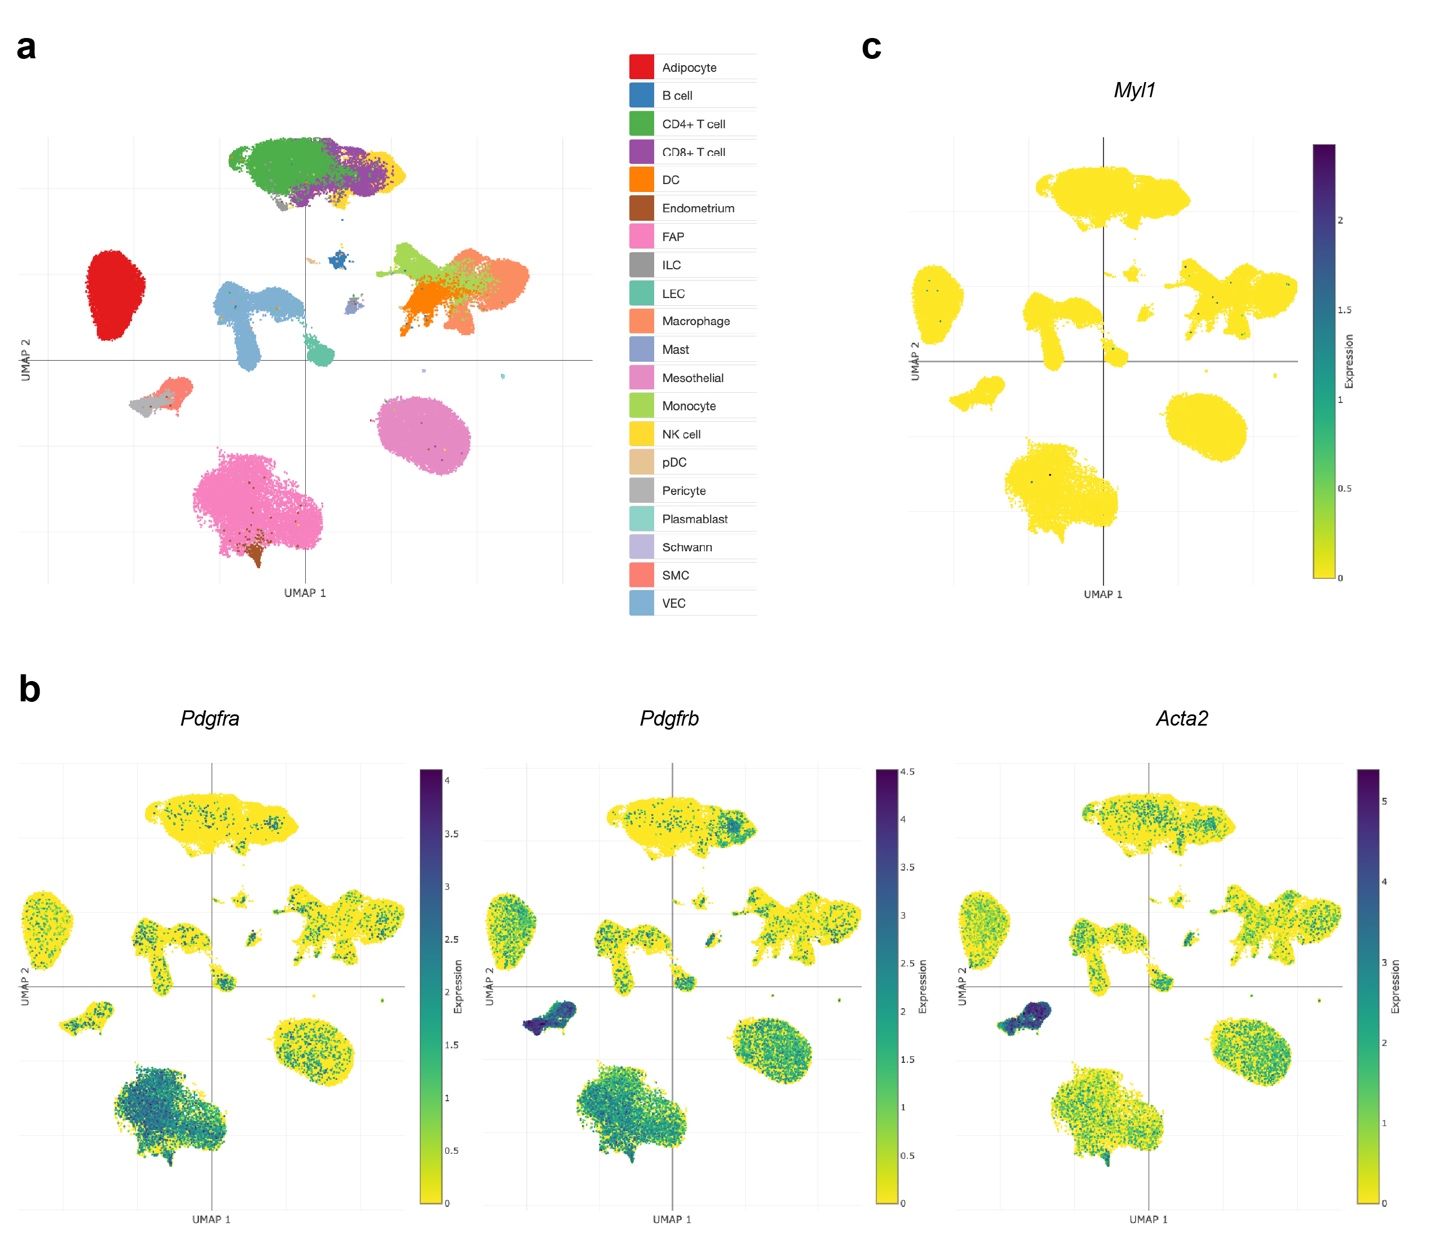


**a**, Cell populations identified by an integrated scRNA-seq and snRNA-seq WAT atlas (WATLAS), accessed at <https://singlecell.broadinstitute.org/single_cell/study/SCP2289/an-integrated-single-cell-and-single-nucleus-rna-seq-white-adipose-tissue-atlas-watlas#study-visualize>. **b, c**, UMAP plots of *Pdgfra*, *Pdgfrb*, *Acta2* (b) and *Myl1* (c) expression.

**Fig. S3 *Myl1* expression and lineage tracing.**


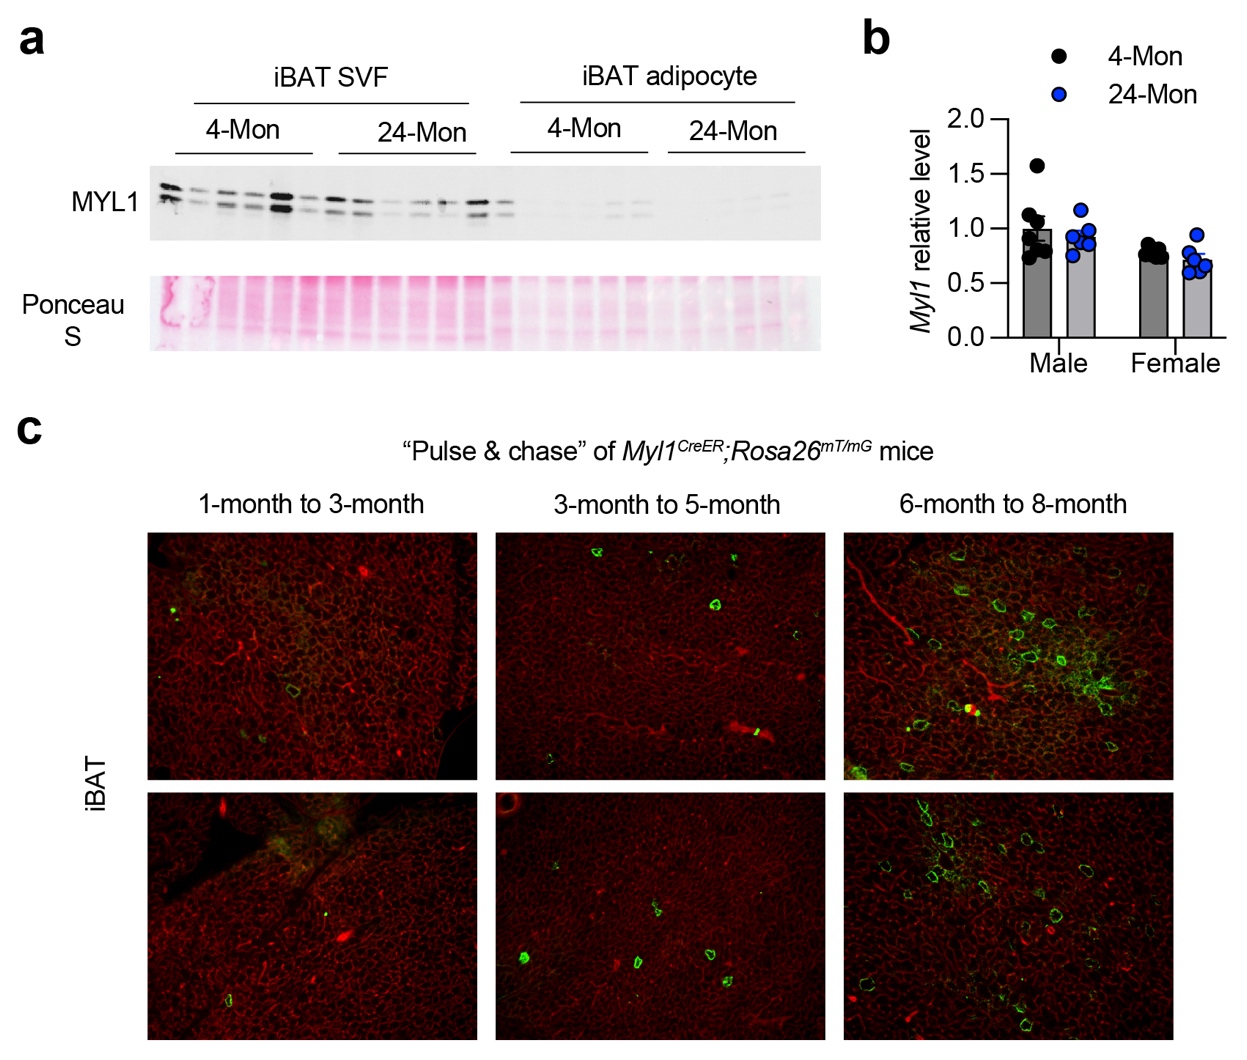


**a**, SVF and mature adipocytes were isolated from iBAT of 4- and 24-month-old male mice. Protein was extracted for Western blotting with anti-MYL1 antibody. **b**, Total iBAT from 4- and 24-month-old mice was collected for RNA extraction and RT-qPCR for *Myl1* gene expression. **c**, Representative fluorescent images of iBAT frozen section from *Myl1CreERT2Rosa26mT/mG* mice pulsed at 1-, 3-, or 6-month of age and chased for 6-8 weeks. mGFP, green; mTdTomato, red

**Fig. S4 Body and tissue weight of *Myl1CreAdipoqiDTR* mice**

**
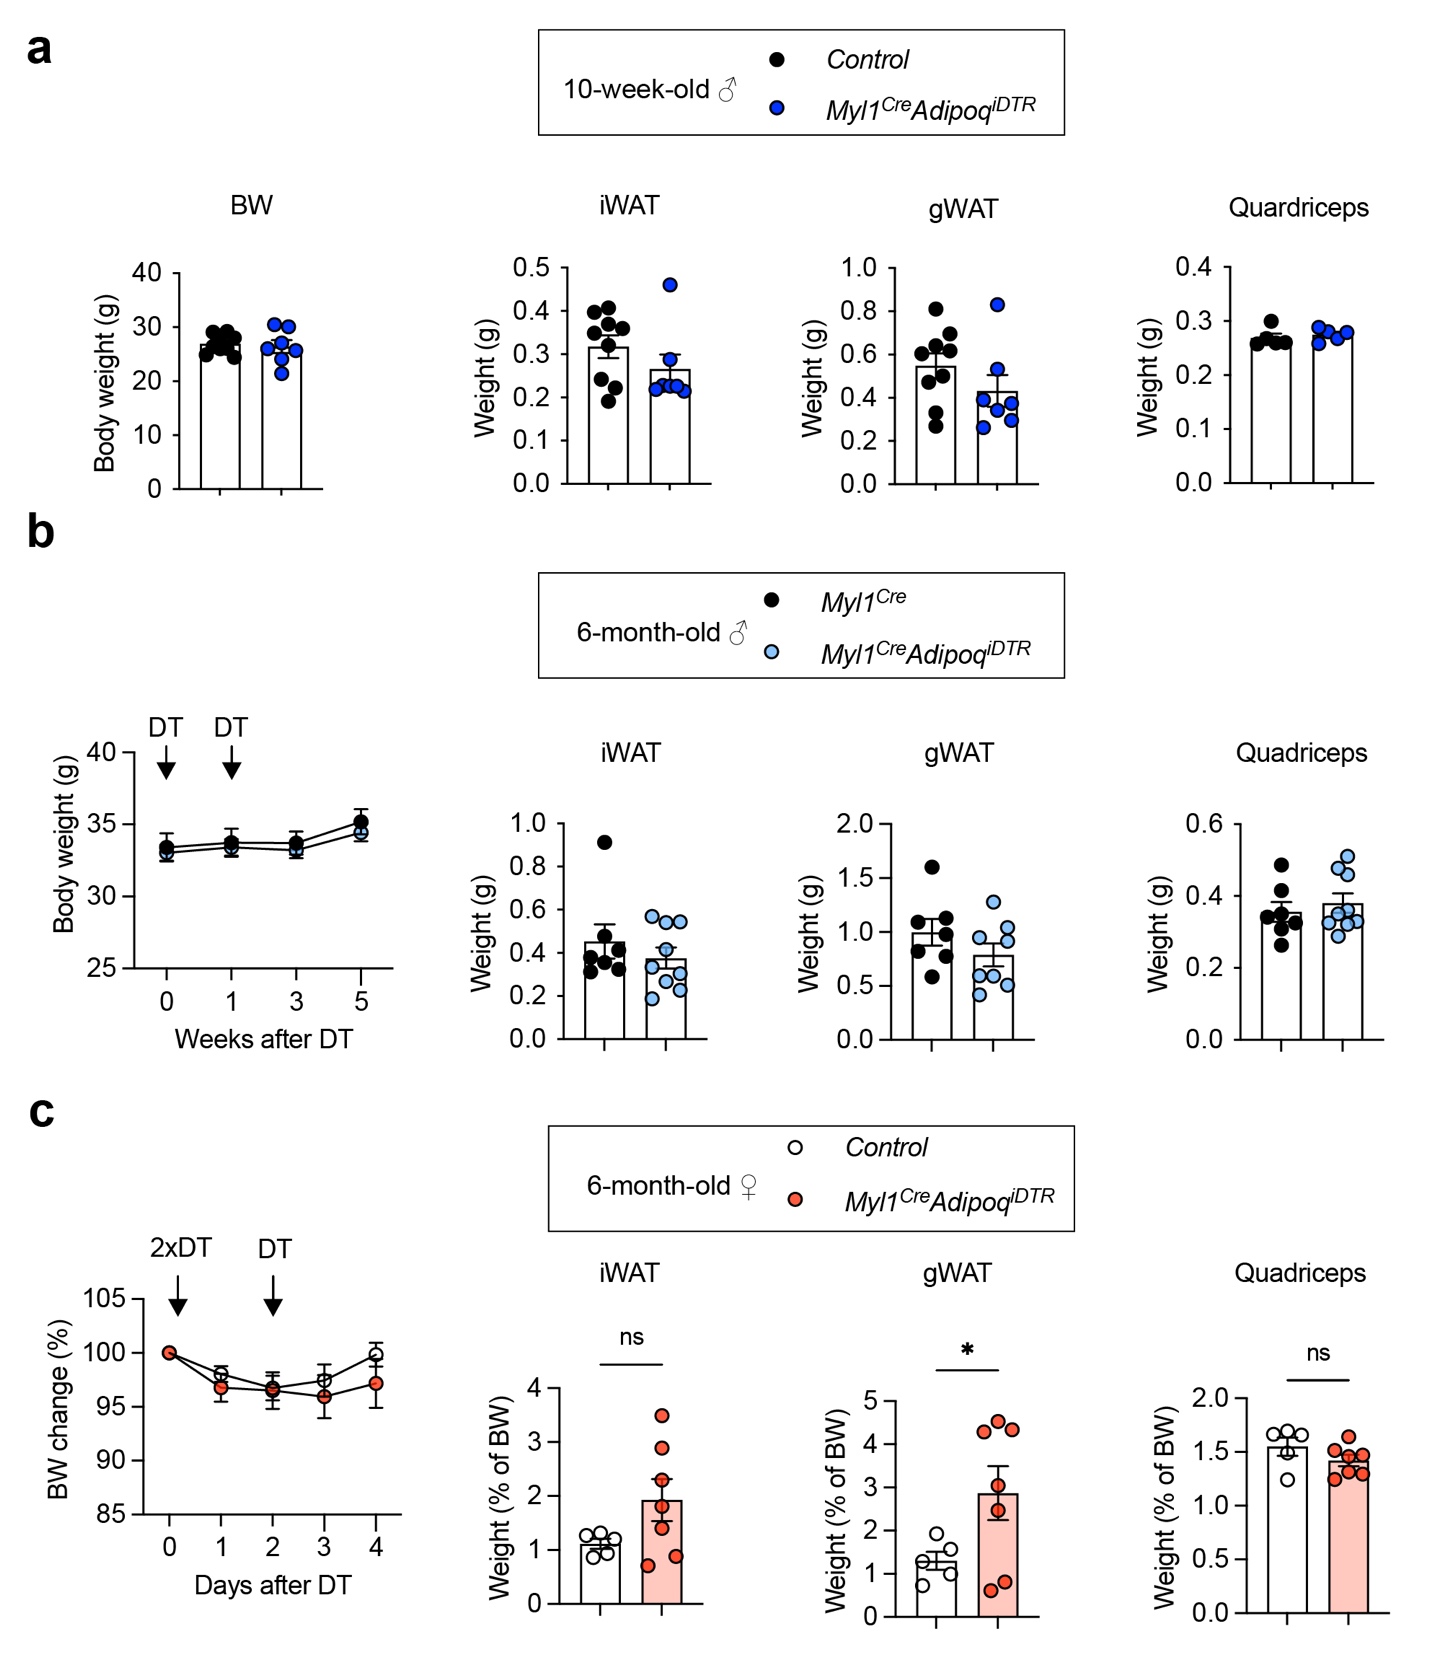
**

**a-c**, 10-week-old male (a), 6-month-old male (b), and 6-month-old female (c) *Myl1CreAdipoqiDTR* mice were treated as described in text and Fig. 5. Body mass and weights of iWAT, gWAT, and quadriceps were measured. Data are mean ± SEM. P values were calculated by a two-tailed unpaired Student’s *t*-test. **P* < 0.05, ns, not significant.

**Fig. S5 Ribosomal RNA-seq of *RiboTagMyl1-Cre*and *RiboTagUcp1-Cre*BAT**

**
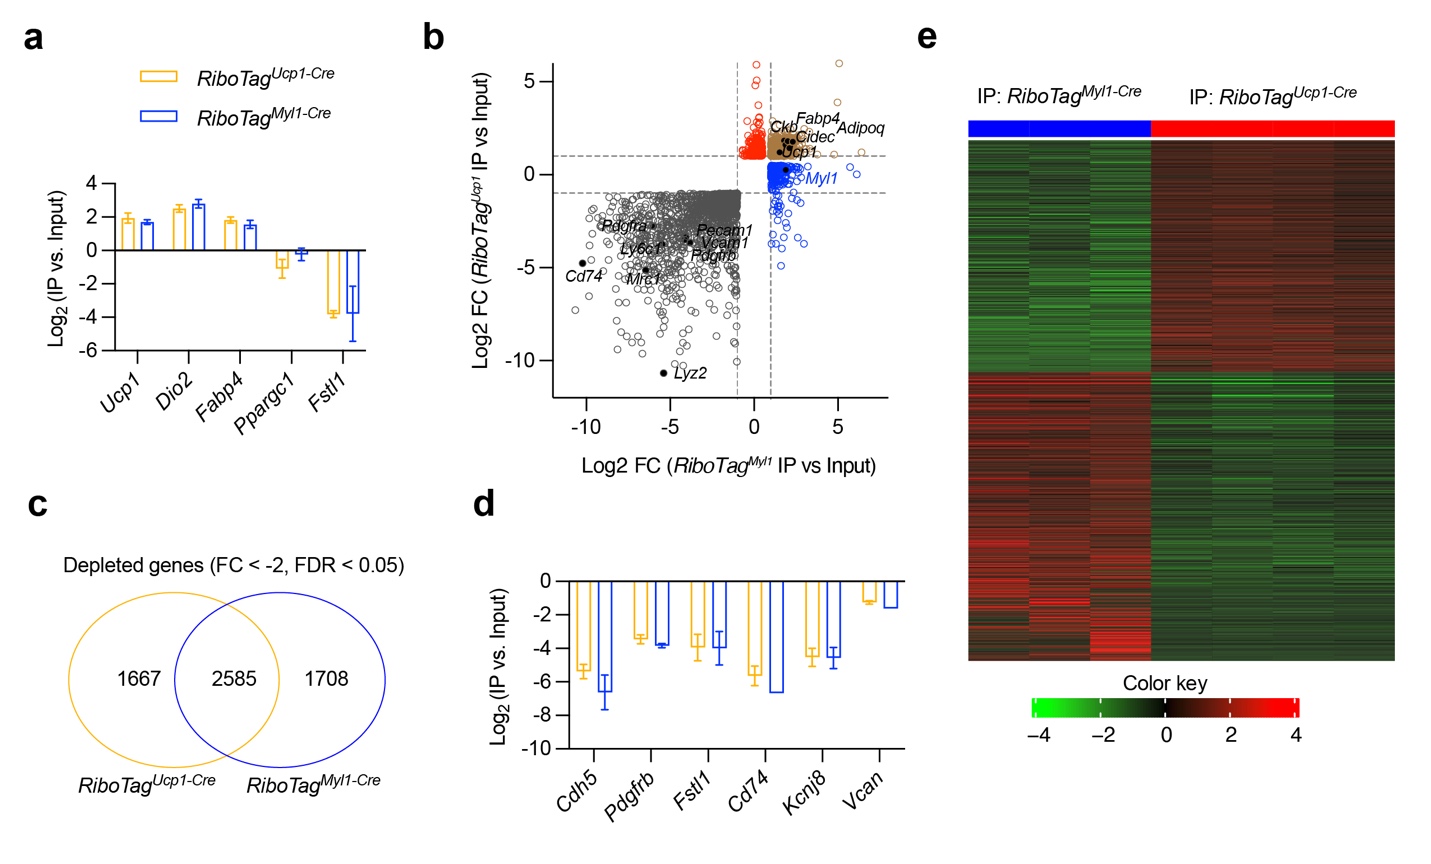
**

**a**, RT-qPCR quantification of relative expression (log2FC) of selected genes in ribosomal IP normalized to input, demonstrating the efficient enrichment of adipocyte ribosomes. **b**, 4-way plot for genes enriched in *RiboTagMyl1-Cre*ribosomes (blue), *RiboTagUcp1-Cre*ribosomes (red), commonly enriched (tan), and commonly depleted (grey). **c**, Venn diagram showing numbers of significantly depleted genes in *RiboTagMyl1-Cre*and *RiboTagUcp1-Cre*BAT. **d**, Depletion of selected stromal genes in ribosomal IP compared to total input. **e**, Heatmap of differentially expressed genes between *RiboTagMyl1-Cre*and *RiboTagUcp1-Cre*ribosomes. Data are mean ± SEM. P values were calculated by a two-tailed unpaired Student’s *t*-test.

**Fig. S6 Re-analysis of publicly available BAT snRNA-seq data**

**
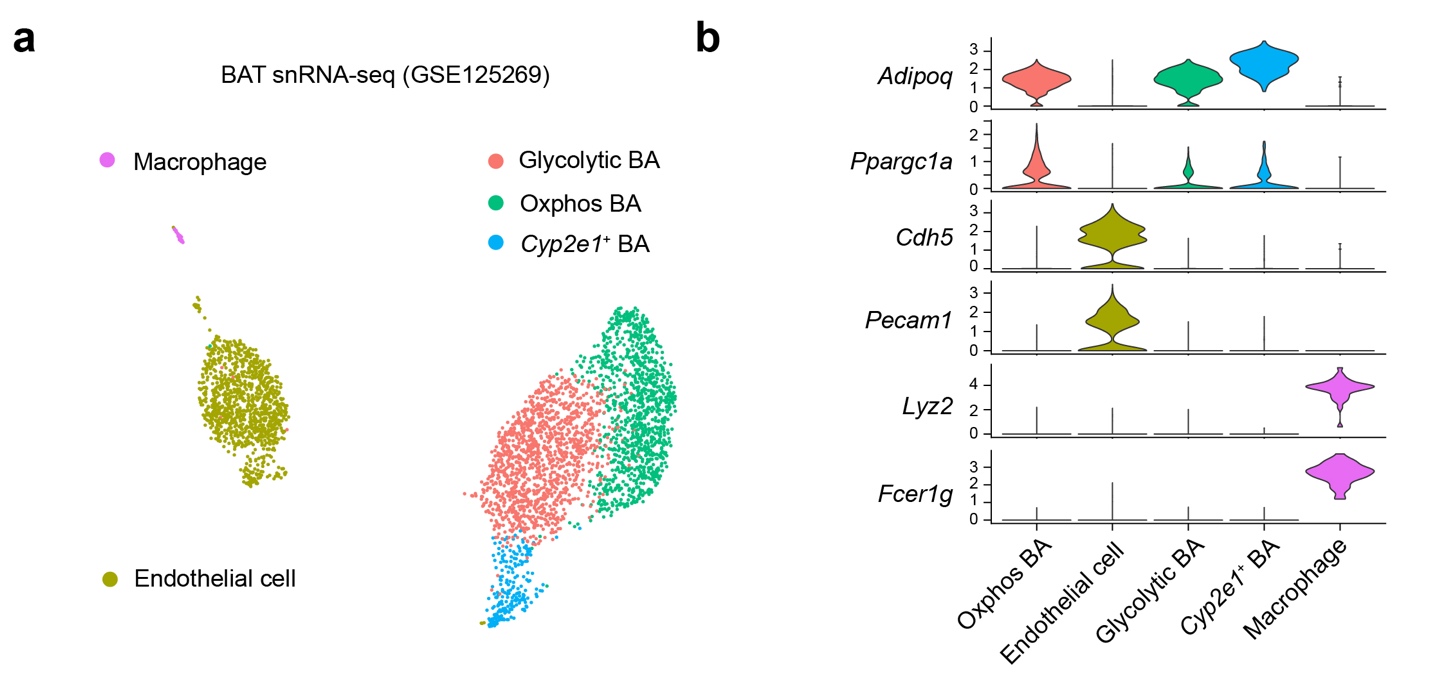
**

**a**, UMAP plot of cell populations identified from GSE125269. **b**, Violin plot of mark genes for adipocytes, endothelial cells, and macrophages.

**Fig. S7 Characterization of old female *PpargΔMyl1* mice**

**
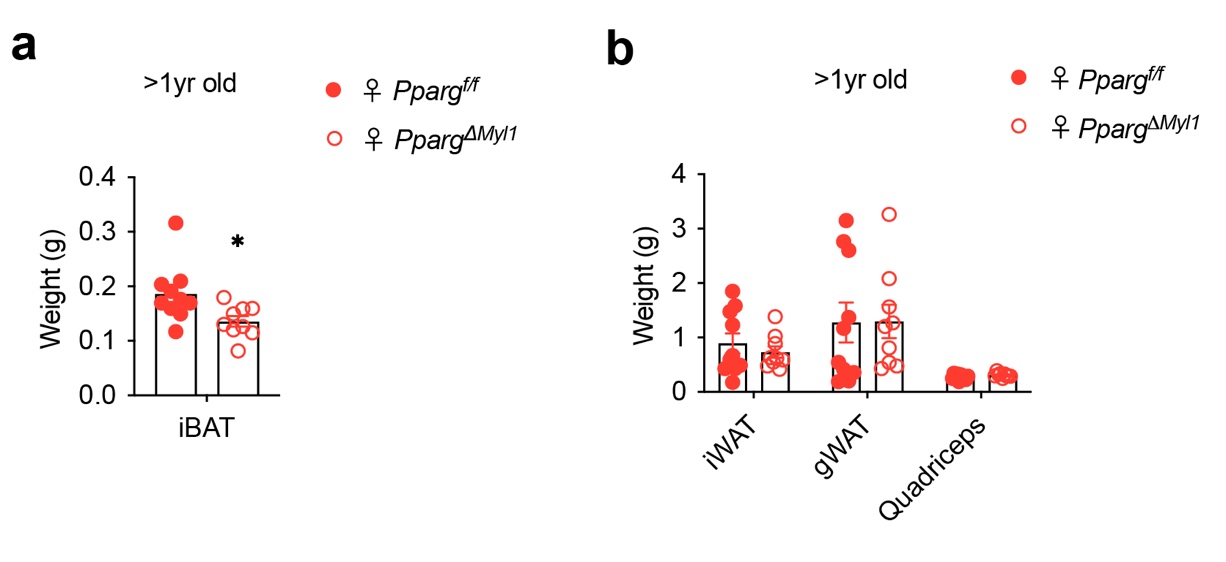
**

**a**, Body weight of 11-18 months old *Ppargf/f* and *PpargΔMyl1* female mice (n = 9-10). **b**, Weight of iWAT, gWAT, and quadriceps of 11-18-month-old *Ppargf/f* and *PpargΔMyl1* female mice (n = 9-10). Data are mean ± SEM. P values were calculated by a two-tailed unpaired Student’s *t*-test. **P* < 0.05.
